# Supplementary material
Source: PubMed Central journal article supplement (PMC7758829)

## Supplementary Online Content

Robbins CB, Thompson AC, Bhullar PK, et al. Characterization of retinal microvascular and choroidal structural changes in Parkinson disease. *JAMA Ophthalmol*. Published online December 23, 2020. doi:10.1001/jamaophthalmol.2020.5730

**eFigure 1.** Representative 6x6-millimeter Optical Coherence Tomography Angiography (OCTA) Images

**eFigure 2.** Box Plots for Each Retinal Parameter With Dot Plots

**eFigure 3.** Area Under the Receiver Operating Characteristic (AUROC) Curves for Each OCTA (Panel A) and OCT (Panel B) Retinal Parameter Studied

This supplementary material has been provided by the authors to give readers additional information about their work.

**eFigure 1. Representative 6x6-millimeter Optical Coherence Tomography Angiography (OCTA) Images**

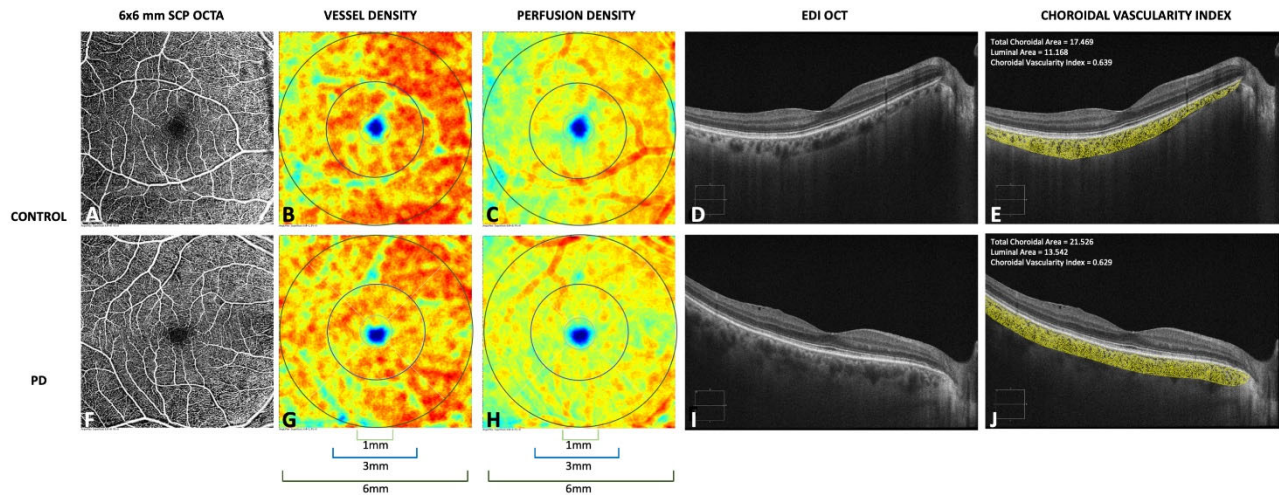

Representative 6x6-millimeter (mm) optical coherence tomography angiography (OCTA) images of the superficial capillary plexus (SCP) and enhanced depth imaging (EDI) foveal scans in the right eye of one individual with Parkinson’s disease (PD, Panel A) and the right eye of one age and sex matched healthy control (Panel F). Corresponding quantitative color maps (Carl Zeiss Meditec, Dublin, CA) of vessel density (Panels B and G) and perfusion density (Panels C and H) are shown with the scale on the right, showing decreased vessel density and perfusion density in the individual with PD. Resulting images from binarization of EDI foveal scans of the right eye are shown with quantitative metrics for each patient reported (control participant (Panel D and E): total choroidal area = 17.469, luminal area = 11.168, choroidal vascularity index 0.639, or 63.9%; PD participant (Panel I and J): total choroidal area = 21.526, luminal area = 13.542, choroidal vascularity index = 0.629, or 62.9%).

**eFigure 2.** Box Plots for Each Retinal Parameter With Dot Plots

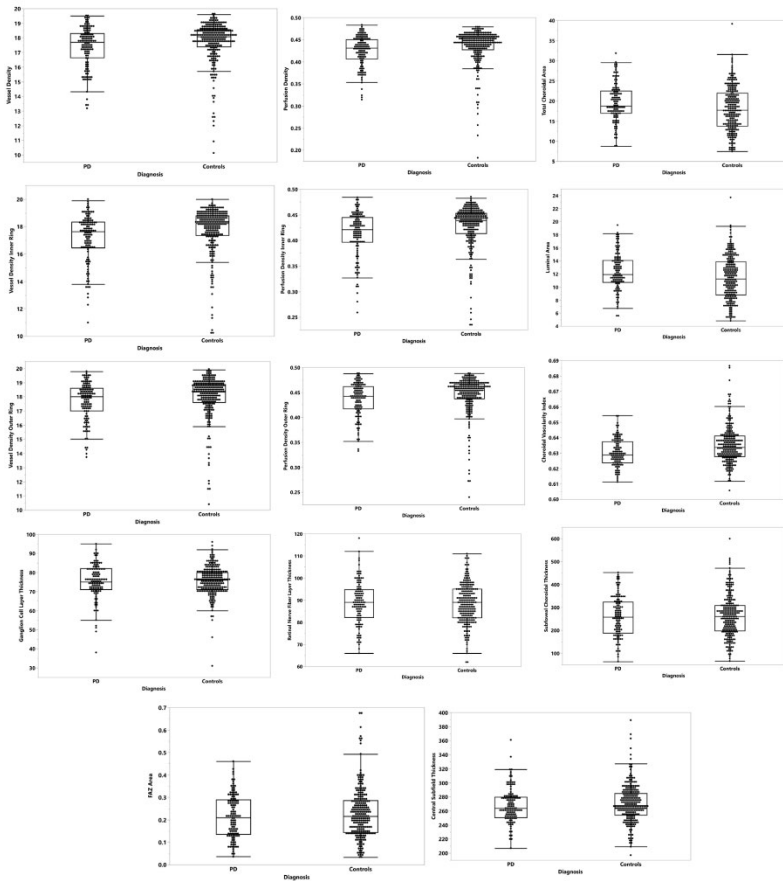

Each dot represents an individual measurement. The middle line within each box represents the median, the outer lines represent the 25<sup>th</sup> and 75<sup>th</sup> percentile values, and outer lines are equal to lower and upper adjacent values (defined as the largest observation less than or equal to the upper inner fence, which is the third quartile plus 1.5 times the interquartile range).

**eFigure 3.** Area Under the Receiver Operating Characteristic (AUROC) Curves for Each OCTA (Panel A) and OCT (Panel B) Retinal Parameter Studied

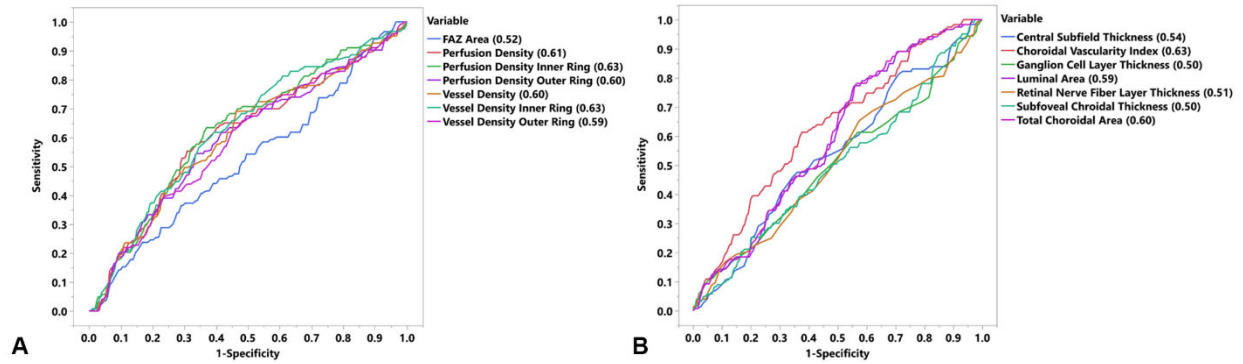

Supplement: jamaophthalmol-e205730-s001.pdf [file jamaophthalmol-e205730-s001.pdf]
